# Supplementary material
Source: publisher figshare collection journal article supplement (https://rs.figshare.com/ndownloader/files/12355136)
Supplement: Supplementary file 1 [file 12355136]

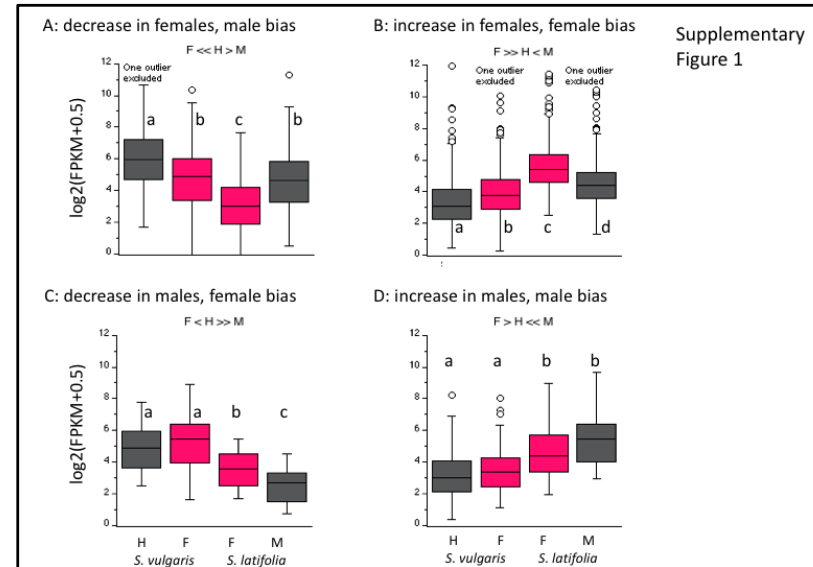

**Supplementary Figure S1.** Summary of the estimated expression intensities in contigs with detectable sex biases in expression in *S. latifolia* males and females due to changes that are mainly in females or males). The changes in each sex, relative to the expression in the hermaphrodite, are indicated using the same notation as in Figure 1, and panels A to D correspond with the panels with the same letters in Figure 2, which shows results for changes specific to females or males; as in that figure, differences significant with  $P < 0.05$ , after adjusting for multiple testing ([Benjamini and Hochberg 1995](#)) using multiple Wilcoxon tests are indicated by different letters in the figure.
